# Supplementary material for: Bimetallic liquid crystal blends based on structurally related 3d-metal coordination complexes
Source: Royal Society of Chemistry journal article supplement (doi:10.1039/d3cc02930a), 2023-01-01
Supplement: d3cc02930a1.pdf [file d3cc02930a1.pdf]

## **Bimetallic Liquid Crystal Blends Based on Structurally Related 3d-Metal Coordination Complexes**

Carmen Cretu, Evelyn Popa, Giuseppe Di Maio, Angela Candreva, Ildiko Buta, Alexadru Visan, Massimo La Deda, Bertrand Donnio\* and Elisabeta I. Szerb\*

## Table of Contents

|                                                                                                                                                                                                                                                                                              |              |
|----------------------------------------------------------------------------------------------------------------------------------------------------------------------------------------------------------------------------------------------------------------------------------------------|--------------|
| <b>Experimental Procedures</b> .....                                                                                                                                                                                                                                                         | <b>3</b>     |
| <b>Synthesis and structural characterization</b> .....                                                                                                                                                                                                                                       | <b>4</b>     |
| <b>Figure S1.</b> FT-IR spectra of complexes <b>Zn_MM</b> (left) and <b>Cu_MM</b> (right) plotted against their precursors (phen)MCl <sub>2</sub> spectra.....                                                                                                                               | <b>5</b>     |
| <b>Figure S2.</b> <sup>1</sup> H NMR spectra of <b>Zn_MM</b> .....                                                                                                                                                                                                                           | <b>5</b>     |
| <b>Preparation of the blends</b> .....                                                                                                                                                                                                                                                       | <b>6</b>     |
| <b>Scheme S1.</b> Preparation of the blends.....                                                                                                                                                                                                                                             | <b>6</b>     |
| <b>Mesomorphic properties</b> .....                                                                                                                                                                                                                                                          | <b>6</b>     |
| <b>POM characterisation</b> .....                                                                                                                                                                                                                                                            | <b>7</b>     |
| <b>Figure S3.</b> POM micrographs for a) <b>Zn_MM</b> on first cooling at 113°C, magnification x50; b) <b>Zn_MM</b> on first cooling at 25°C, magnification x50; c) <b>Cu_MM</b> on first cooling 100°C, magnification x20; b) <b>Cu_MM</b> on first cooling at 25°C, magnification x20..... | <b>7</b>     |
| <b>Figure S4.</b> POM micrographs for a) <b>ZnCu1:3_MM</b> on second cooling at 40°C, magnification x20; b) <b>ZnCu1:1_MM</b> on third cooling at 50°C, magnification x20; c) <b>ZnCu3:1_MM</b> on first cooling 60°C, magnification x20.....                                                | <b>7</b>     |
| <b>TGA, DTG and DSC</b> .....                                                                                                                                                                                                                                                                | <b>8</b>     |
| <b>Figure S5.</b> Superposition of DTG and TGA thermograms of metallomesogens <b>Zn_MM</b> and <b>Cu_MM</b> and corresponding blends <b>ZnCu1:3_MM</b> , <b>ZnCu1:1_MM</b> , <b>ZnCu3:1_MM</b> .....                                                                                         | <b>8</b>     |
| <b>Figure S6.</b> DTG and TGA thermograms of metallomesogens <b>Zn_MM</b> and <b>Cu_MM</b> and corresponding blends <b>ZnCu1:3_MM</b> , <b>ZnCu1:1_MM</b> , <b>ZnCu3:1_MM</b> .....                                                                                                          | <b>8-9</b>   |
| <b>Table S1:</b> Decomposition temperatures, <sup>[a]</sup> mesophases, <sup>[b]</sup> transition temperatures (°C) and enthalpies (ΔH [J·g <sup>-1</sup> ]) <sup>[c]</sup> .....                                                                                                            | <b>9</b>     |
| <b>S/WAXS</b> .....                                                                                                                                                                                                                                                                          | <b>10</b>    |
| <b>Figure S7.</b> S/WAXS patterns of <b>Zn_MM</b> at various temperatures.....                                                                                                                                                                                                               | <b>10</b>    |
| <b>Figure S8.</b> S/WAXS patterns of <b>Cu_MM</b> at various temperatures.....                                                                                                                                                                                                               | <b>10-11</b> |
| <b>Figure S9.</b> S/WAXS patterns of <b>ZnCu1:3_MM</b> at various temperatures. Left: heated to 70°C then cooled to 20°C, without crossing the isotropic temperature. Right: Second heating after thermal treatment.....                                                                     | <b>11</b>    |
| <b>Figure S10.</b> S/WAXS patterns of <b>ZnCu1:1_MM</b> at various temperatures after thermal treatment.....                                                                                                                                                                                 | <b>11-12</b> |
| <b>Figure S11.</b> S/WAXS patterns of <b>ZnCu3:1_MM</b> at various temperatures and after thermal treatment.....                                                                                                                                                                             | <b>12</b>    |
| <b>Table S2.</b> Indexation and mesophases' parameters.....                                                                                                                                                                                                                                  | <b>13-16</b> |
| <b>Optical properties</b> .....                                                                                                                                                                                                                                                              | <b>16</b>    |
| <b>Figure S12.</b> Absorption, Emission and Excitation spectra of <b>Cu_MM</b> and <b>Zn_MM</b> in CH <sub>2</sub> Cl <sub>2</sub> dilute solutions .....                                                                                                                                    | <b>16</b>    |
| <b>Table S3.</b> Main photophysical data of complexes in CH <sub>2</sub> Cl <sub>2</sub> dilute solution.....                                                                                                                                                                                | <b>16</b>    |
| <b>Figure S13.</b> Emission spectra of <b>Zn_MM</b> varying temperature.....                                                                                                                                                                                                                 | <b>17</b>    |
| <b>Figure S14.</b> Emission spectra of <b>ZnCu3:1_MM</b> varying temperature .....                                                                                                                                                                                                           | <b>18</b>    |
| <b>Table S4.</b> Photophysical data of <b>Zn_MM</b> by varying temperature.....                                                                                                                                                                                                              | <b>19</b>    |
| <b>Table S5.</b> Photophysical data of sample <b>ZnCu3:1_MM</b> by varying temperature.....                                                                                                                                                                                                  | <b>19</b>    |
| <b>References</b> .....                                                                                                                                                                                                                                                                      | <b>19</b>    |

## Experimental Procedures

1,10-Phenanthroline monohydrate was purchased from Aldrich; Methyl 3,4,5-trihydroxybenzoate,  $\text{ZnCl}_2$  and  $\text{CuCl}_2 \cdot 2\text{H}_2\text{O}$  were acquired from Merck. The synthesis of the silver(I) salt of 3,4,5-tridodecyloxybenzoate and precursor metal complexes dichloride(1,10-phenanthroline)M(II) of general formula  $(\text{phen})\text{MCl}_2$  where phen = 1,10-phenanthroline and M = Zn(II) or Cu(II) were performed as reported previously.[1]

Sonication of the solutions were performed with an Elmasonic S 30 (H) Ultrasonic cleaning unit (37 kHz, maximum power output of 80 W) at a temperature of 28°C, for 20 minutes.

Infrared spectra (KBr) were recorded on a Cary 630 FT-IR spectrophotometer in the range 4000–400  $\text{cm}^{-1}$ .  $^1\text{H}$  NMR experiments were recorded on a Bruker Avance III HD – 500 MHz spectrometer in  $\text{CDCl}_3$ , using tetramethylsilane (TMS) as internal standard. Elemental analyses (CHN) were performed with a UNICUBE microanalyzer from Elementar. The percentages of M(II) were determined using a SensAA flame atomic absorption spectrometer (GBC Scientific Equipment, Australia). The flame used was an air-acetylene (oxidizing) mixture. Two determinations were made and the average absorbance value was further used. The apparatus was equipped with a copper/zinc hollow cathode lamp (for copper: detection limit: 1-5 mg/L, integration time 3s; for zinc: detection limit: 0.4-1.5 mg/L, integration time 3s).

TG/DTA curves were obtained in the temperature range of 25-800 °C with a heating rate of 10°C/min, using a TGA/SDTA 851/LF/1100 Mettler Toledo thermogravimetric analyzer. The experiments were conducted under nitrogen flow of 50 mL/min and dynamic atmosphere of air introduced at 800°C followed by a final isothermal heating for 15 min. 10-20 mg samples were placed in alumina crucible of 150 mL.

Mesophases optical textures were observed with an Olympus BX53M polarizing microscope (POM) equipped with a Linkam hot-stage. Images of the various phases were recorded using an Olympus UC90 camera. Enthalpies and transition temperatures were recorded using a Discovery DSC 25 apparatus from TA Instruments. The apparatus was calibrated with indium; three heating/cooling cycles were performed on each sample, with a heating and cooling rate of 10°C/min.

S/WAXS patterns were obtained with a transmission Guinier-like geometry. A linear focalized monochromatic Cu K $\alpha$ 1 beam ( $\lambda = 1.5405 \text{ \AA}$ ) was obtained using a sealed-tube generator (600 W) equipped with a bent quartz monochromator. In all cases, samples were filled in home-made sealed cells of 1 mm path. The patterns were recorded with a curved Inel CPS120 counter gas-filled detector linked to a data acquisition computer (periodicities up to 90 Å) and on image plates scanned by Amersham Typhoon IP with 25  $\mu\text{m}$  resolution (periodicities up to 120 Å). The sample temperature was controlled within  $\pm 0.01^\circ\text{C}$ , and exposure times were varied from 2 to 6 h.

Spectrofluorimetric grade  $\text{CH}_2\text{Cl}_2$  were used for the photophysical investigations in solution without further purification. A PerkinElmer Lambda 900 spectrophotometer was used to obtain the UV/vis absorption spectra, a Perkin-Elmer LS 50B spectrofluorimeter was used to obtain the emission spectra in solution, in both cases quartz cuvettes of a 1 cm path length were used. Solid-state emission spectra were recorded on a Horiba Jobin Yvon Fluorolog 3 spectrofluorimeter, equipped with a Hamamatsu R-928 photomultiplier tube. The luminescence quantum yields of the samples in solution were determined using the optical dilution method[4] 2-aminopyridine in ethanol solution as a reference standard ( $\Phi = 0.37^5$ ). With regard to the solid state measurements, samples were prepared by placing a given amount of powder between two quartz slides and standardizing the thickness of the sample layer by pressing and sliding to each other the quartz slides. The emission quantum yields of the solid samples were obtained by means of a 102 mm diameter integrating sphere coated with Spectralon® and mounted in the optical path of the spectrofluorimeter using, as the excitation source, a 450 W xenon lamp coupled with a double-grating monochromator for selecting wavelengths. The procedure for the measure of quantum yields with integrating sphere was based on De Mello method.[5] Measurements varying temperature were performed through a heating sample holder connected to a heating plate (CaLCTec Instruments).

Time resolved measurements were performed using the time-correlated single-photon counting (TCSPC) on the Fluorolog-3 apparatus. NanoLEDs pulse centred at 379 nm and 265 nm (FWHM 750 ps with 1 MHz repetition rate) were used as the excitation source and fixed directly on the sample chamber at 90° to a single-grating emission monochromator (2.1 nm  $\text{mm}^{-1}$  dispersion; 1200 grooves per mm). Data analysis

was performed using the commercially available DAS6 software (Horiba Jobin Yvon IBH). The quality of the fit was assessed by minimizing the reduced  $\chi^2$  function and visual inspection of the weighted residuals.

### Synthesis and structural characterization

All compounds were structurally characterized by FT-IR,  $^1\text{H}$  NMR (for Zn\_MM) and atomic absorption spectroscopies and elemental analysis methods.

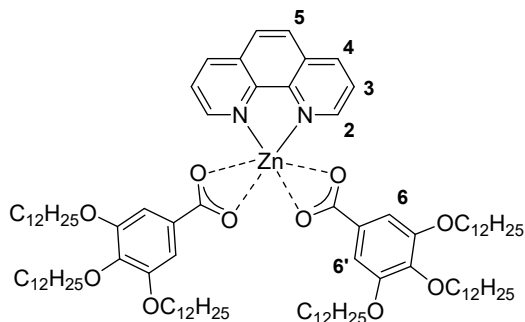

**Complex Zn\_MM.** A solution of Ag(I) salt of 3,4,5-tridodecyloxybenzoate (0.274 g, 0.350 mmol) in 50 mL  $\text{CHCl}_3$  was added dropwise to a suspension of (phen) $\text{ZnCl}_2$  (0.050 g, 0.159 mmol) in 10 mL of MeOH. The reaction mixture was stirred at room temperature for 6h. After the removal of AgCl by filtration, the mother liquor was evaporated under reduced pressure. The residue was dissolved in  $\text{CHCl}_3$  and acetone was added. The precipitate formed was filtered out, and the pure product was obtained from the mother solution by repeated recrystallization from acetone and hexane/EtOH (0.188 g, 74%). FT-IR (KBr,  $\text{cm}^{-1}$ ): 2921 ( $\nu_{\text{as}}, (-\text{CH}_2-)$ ), 2852 ( $\nu_{\text{s}}, (-\text{CH}_2-)$ ), 1559 ( $\nu_{\text{as}}, (\text{COO}^-)$ ), 1539 – 1422 ( $\nu_{\text{C}=\text{C}}, \nu_{\text{C}=\text{N}}$ ) 1380 ( $\nu_{\text{s}}, (\text{COO}^-)$ );  $^1\text{H}$ -NMR ( $\text{CDCl}_3$ ,  $\delta/\text{ppm}$ ): 9.48 (d,  $^3J = 4.7$  Hz, 2H,  $\text{H}^2$ ), 8.55 (dd,  $^3J = 8.2$  Hz,  $^4J = 1.6$  Hz, 2H,  $\text{H}^4$ ), 8.07-7.86 (overlapped peaks, 4H,  $\text{H}^5, \text{H}^3$ ), 7.40 (s, 4H,  $\text{H}^{6,6'}$ ), 3.96 (m, 12 H,  $-\text{OCH}_2$ ), 1.73 (m, 12H,  $-\text{OCH}_2\text{CH}_2$ ), 1.54 – 1.10 (overlapped peaks, 108 H), 0.87 (t,  $^3J = 7.0$  Hz, 18H,  $-\text{CH}_3$ ). Anal. Calcd. for  $\text{C}_{98}\text{H}_{162}\text{N}_2\text{O}_{10}\text{Zn}$  (1593.73  $\text{g}\cdot\text{mol}^{-1}$ ): C, 73.85; H, 10.25; N, 1.76. Found: C, 73.64; H, 10.12; N, 1.64%. AAS: Zn% calcd.: 4.10, found: 4.03.

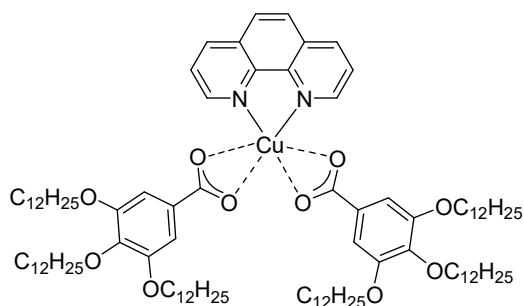

**Complex Cu\_MM.** A solution of Ag(I) salt of 3,4,5-tridodecyloxybenzoate (0.274 g, 0.350 mmol) in 50 mL  $\text{CHCl}_3$  was added dropwise to a suspension of (phen) $\text{CuCl}_2$  (0.050 g, 0.159 mmol) in 10 mL of MeOH. The reaction mixture was stirred at room temperature for 6h. After the removal of AgCl by filtration, the mother liquor was evaporated under reduced pressure. The residue was dissolved in  $\text{CHCl}_3$  and acetone was added. The precipitate formed was filtered out, and the pure product was obtained from the mother solution by repeated recrystallization from acetone and hexane/EtOH (0.256 g, 58%). FT-IR (KBr,  $\text{cm}^{-1}$ ): 2923 ( $\nu_{\text{as}}, (-\text{CH}_2-)$ ), 2853 ( $\nu_{\text{s}}, (-\text{CH}_2-)$ ), 1562 ( $\nu_{\text{as}}, (\text{COO}^-)$ ), 1522 – 1425 ( $\nu_{\text{C}=\text{C}}, \nu_{\text{C}=\text{N}}$ ) 1375 ( $\nu_{\text{s}}, (\text{COO}^-)$ ). Anal. Calcd. for  $\text{C}_{98}\text{H}_{162}\text{CuN}_2\text{O}_{10}$  (1591.89  $\text{g}\cdot\text{mol}^{-1}$ ): C, 73.94; H, 10.26; N, 1.76. Found: C, 73.84; H, 10.10; N, 1.65%. AAS: Cu% calcd.: 3.99, found: 3.92.

## Structural characterization

The FT-IR spectra of **Zn\_MM** and **Cu\_MM** are superimposable, confirming the similar structure and coordination environment for both coordination complexes. Moreover, the separation of the C-O stretching vibrations:  $\Delta = 179 \text{ cm}^{-1}$  for **Zn\_MM** and  $187 \text{ cm}^{-1}$  for **Cu\_MM** respectively, show a bidentate chelating nature of the carboxylate coordination mode.

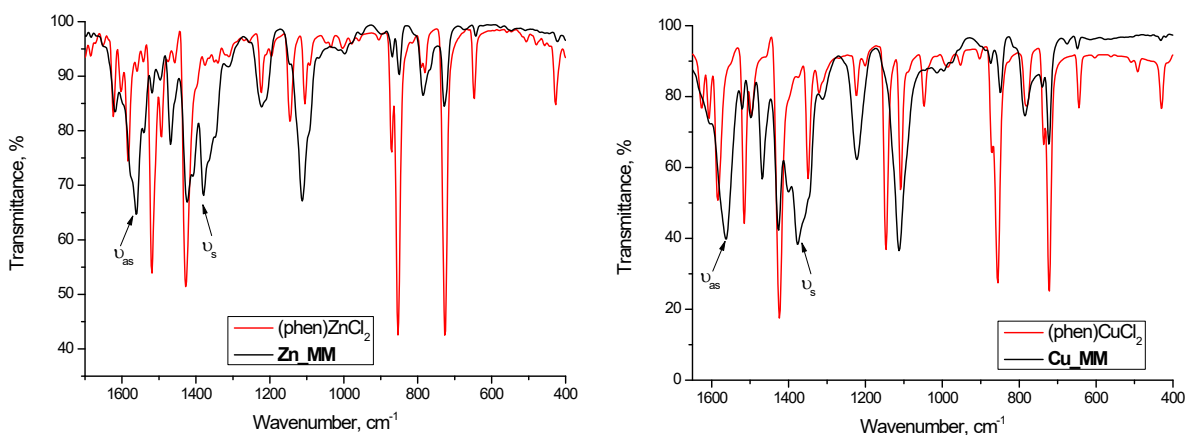

**Figure S1.** FT-IR spectra of complexes **Zn\_MM** (left) and **Cu\_MM** (right) plotted against their precursors (phen)MCl<sub>2</sub> spectra.

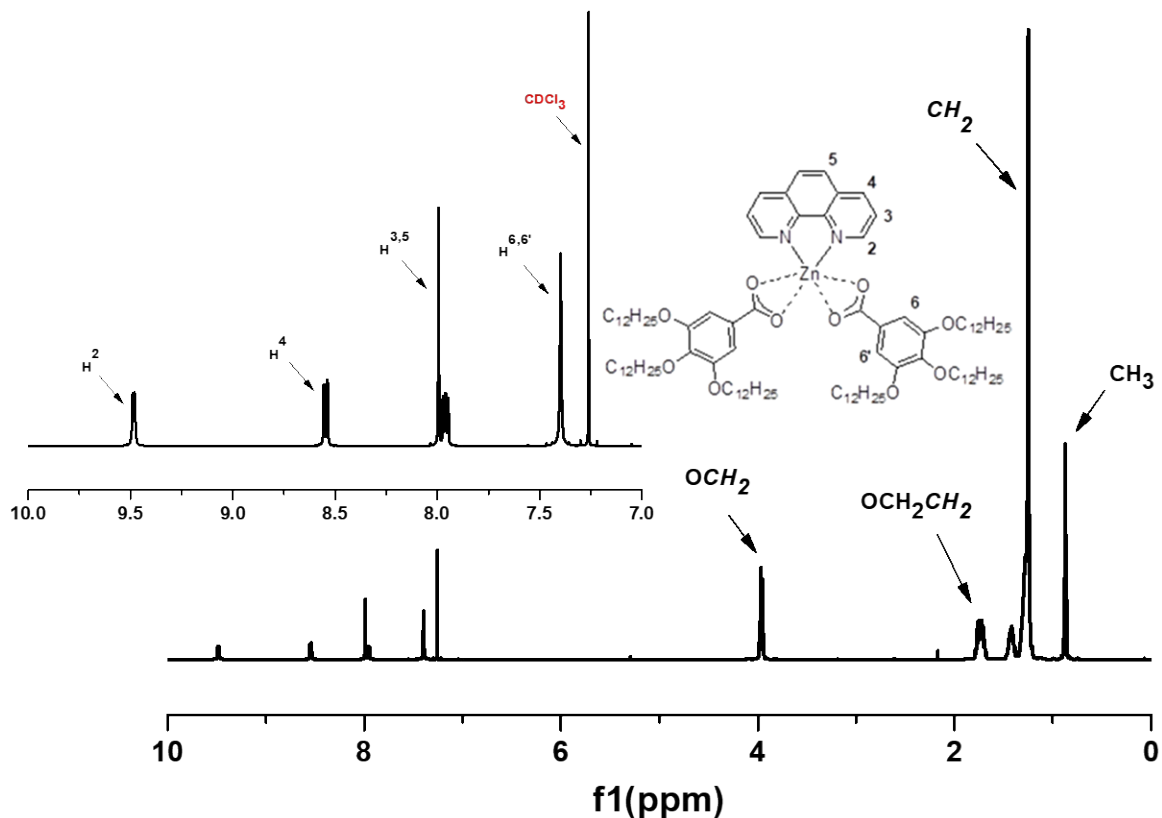

**Figure S2.**  $^1\text{H}$  NMR spectra of Zn\_MM.

## Preparation of the blends

Both complexes' blends were obtained by dissolving the proper quantities tabled below in 1 mL of  $\text{CH}_2\text{Cl}_2$ , followed by 20 minutes sonication (ultrasonic cleaning bath, 37 kHz, 80 W,  $28^\circ\text{C}$ ) and evaporation at room temperature. The mixtures were then dried under vacuum.

| Blend ratio (w/w) | Zn_MM | Cu_MM | Abbreviation |
|-------------------|-------|-------|--------------|
| 1:3               | 25 mg | 75 mg | ZnCu1:3_MM   |
| 1:1               | 50 mg | 50 mg | ZnCu1:1_MM   |
| 3:1               | 75 mg | 25 mg | ZnCu3:1_MM   |

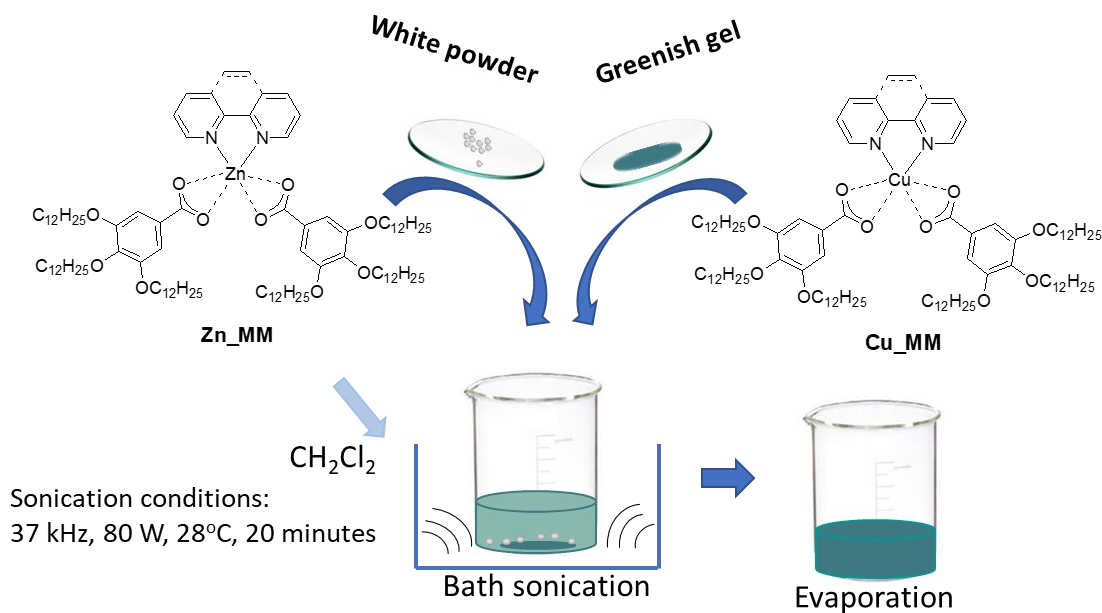

**Scheme S1.** Preparation of the blends.

## Mesomorphic properties

The thermal stability and the mesomorphic properties of the complexes and various blends were performed by a combination of TGA analysis, polarized optical microscopy (POM), differential scanning calorimetry (DSC) and small- and wide-angle X-ray scattering studies (S/WAXS).

### POM characterisation

Both complexes **Zn\_MM** and **Cu\_MM** show fan-shaped textures suggesting columnar phases (Figure S3). Beside change of color on cooling, no sign of crystallization can be observed. All blends, and in particular **ZnCu1:3\_MM** and **ZnCu1:1\_MM**, also present fan-shaped textures, while that of **ZnCu3:1\_MM** is less birefringent (Figure S4).

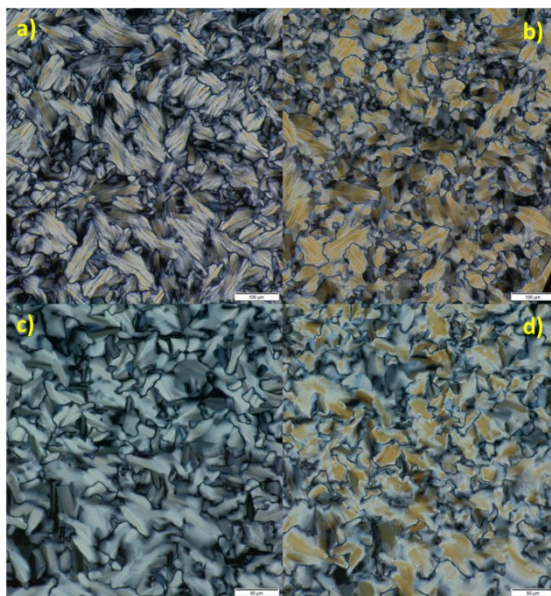

**Figure S3.** POM micrographs for a) **Zn\_MM** on first cooling at 113°C, magnification x50; b) **Zn\_MM** on first cooling at 25°C, magnification x50; c) **Cu\_MM** on first cooling 100°C, magnification x20; d) **Cu\_MM** on first cooling at 25°C, magnification x20.

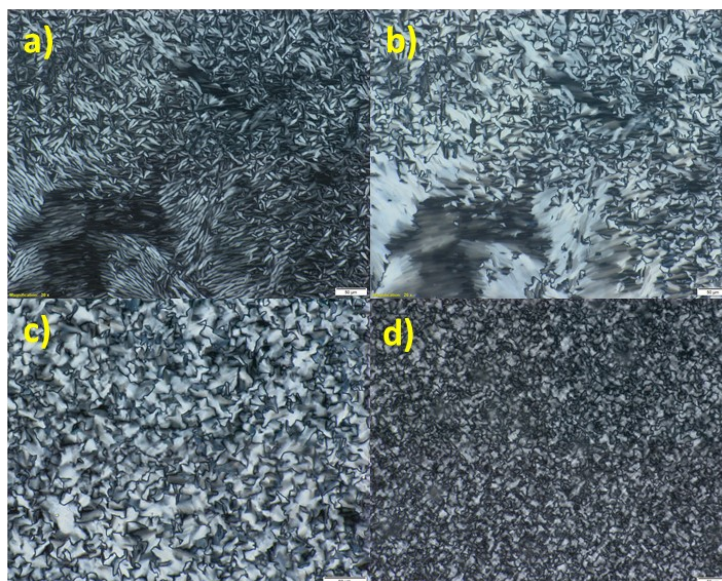

**Figure S4.** POM micrographs for a) **ZnCu1:3\_MM** on second cooling at 88°C, magnification x20, in the binary phase: Col<sub>hex</sub>+Iso; b) **ZnCu1:3\_MM** on second cooling at 66°C, magnification x20: same position as a) in the Col<sub>hex</sub> phase; c) **ZnCu1:1\_MM** on third cooling at 50°C, magnification x20; d) **ZnCu3:1\_MM** on second cooling at 35°C, magnification x20.

## TGA, DTG and DSC

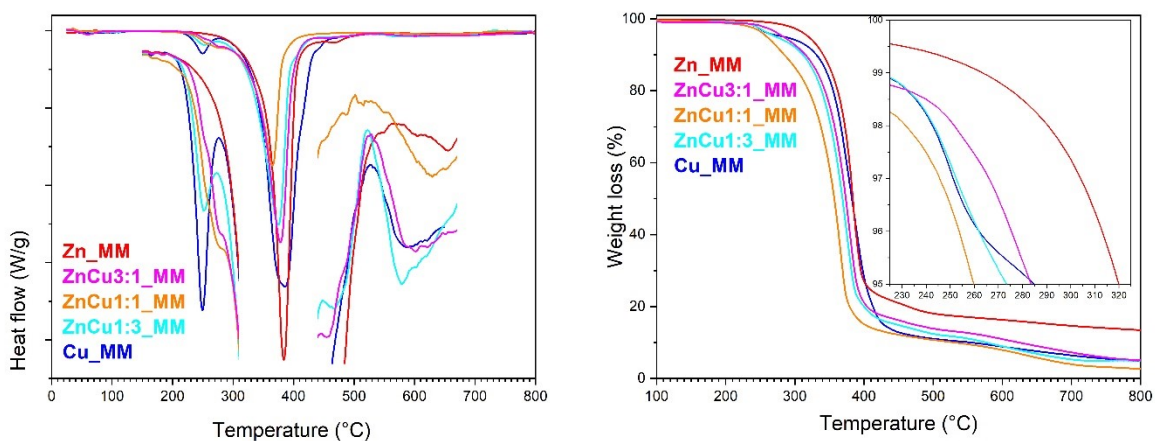

**Figure S5.** Superposition of DTG and TGA thermograms of metallomesogens **Zn\_MM** and **Cu\_MM** and corresponding blends **ZnCu1:3\_MM**, **ZnCu1:1\_MM**, **ZnCu3:1\_MM**.

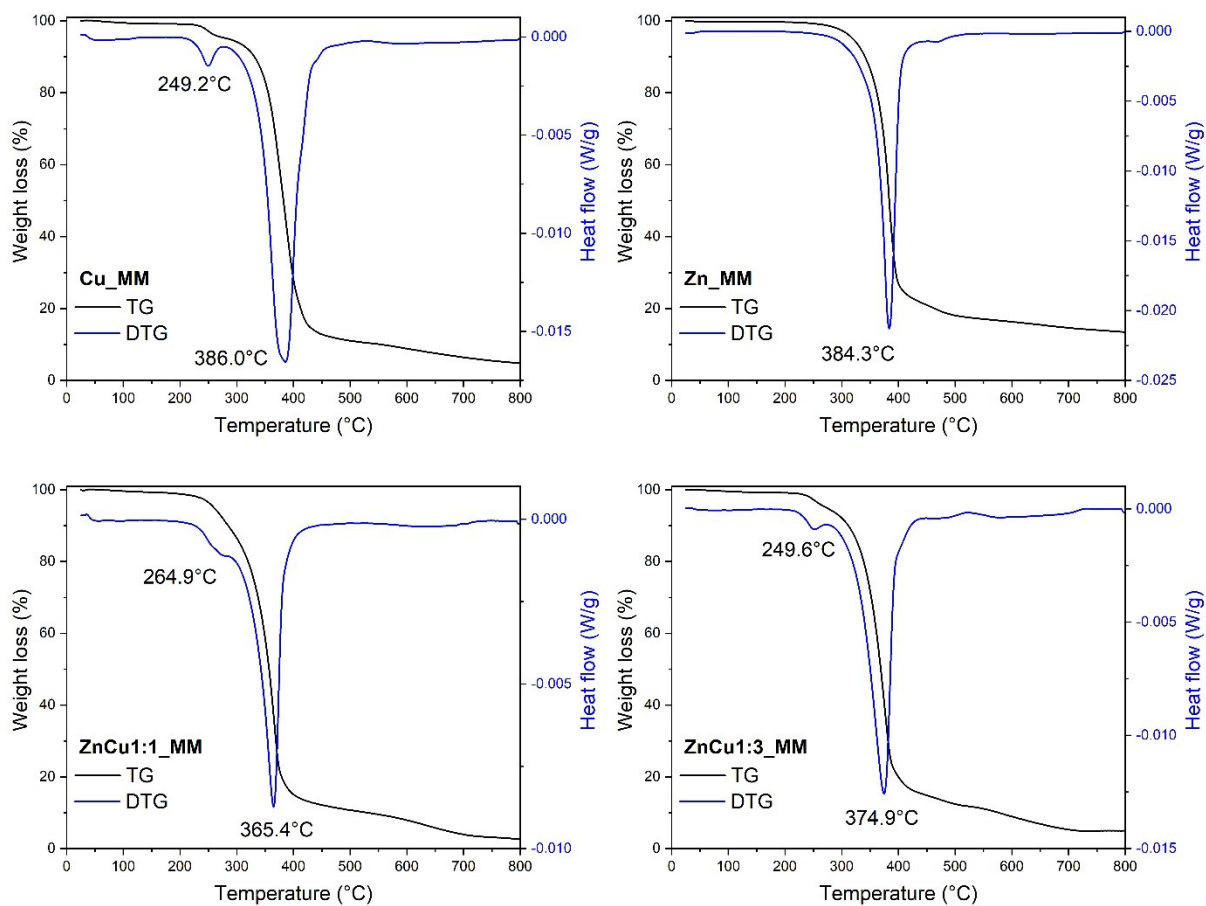



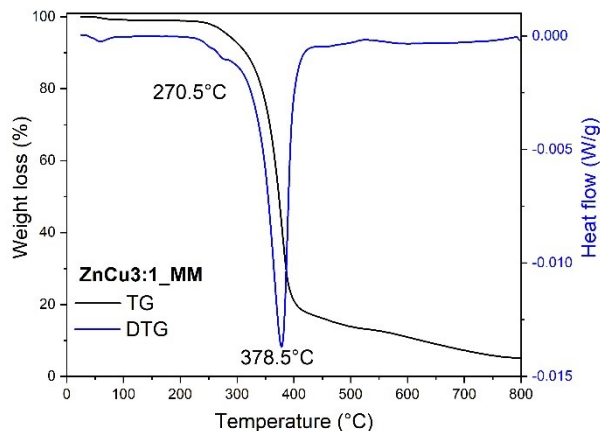

**Figure S6.** DTG and TGA thermograms of metallomesogens **Zn\_MM** and **Cu\_MM** and corresponding blends **ZnCu1:3\_MM**, **ZnCu1:1\_MM**, **ZnCu3:1\_MM**.

**Table S1:** Decomposition temperatures,<sup>[a]</sup> mesophases,<sup>[b]</sup> transition temperatures (°C) and enthalpies ( $\Delta H$  [ $J \cdot g^{-1}$ ])<sup>[c]</sup>.

| Material          | $T_{dec5\%}$ <sup>[a]</sup><br>[°C] | 1 <sup>st</sup> and 2 <sup>nd</sup> heating                                                                                                            | 1 <sup>st</sup> and 2 <sup>nd</sup> cooling                                                                                                               |
|-------------------|-------------------------------------|--------------------------------------------------------------------------------------------------------------------------------------------------------|-----------------------------------------------------------------------------------------------------------------------------------------------------------|
| <b>Zn_MM</b>      | 320                                 | Cr 73.3 [101.8] Col <sub>rec</sub> 114.5 [7.0] Iso<br>Col <sub>rec</sub> 114.4 [6.6] Iso                                                               | Iso 104.4 [-7.4] Col <sub>rec</sub><br>Iso 104.3 [-7.2] Col <sub>rec</sub>                                                                                |
| <b>Cu_MM</b>      | 285                                 | Col <sub>hex</sub> 88.0 [3.8] Iso<br>Col <sub>hex</sub> 86.6 [1.9] Iso                                                                                 | Iso 86.0 [-2.4] Col <sub>hex</sub><br>Iso 85.9 [-2.4] Col <sub>hex</sub>                                                                                  |
| <b>ZnCu1:3_MM</b> | 273                                 | Col <sub>hex</sub> 80.8 [1.14] Col <sub>hex</sub> +Iso 93.2<br>[1.54] Iso<br>Col <sub>hex</sub> 80.4 [1.12] Col <sub>hex</sub> +Iso 92.9<br>[1.74] Iso | Iso 89.0 [-1.99] Col <sub>hex</sub> +Iso 70.9 [-<br>1.14] Col <sub>hex</sub><br>Iso 88.5 [-1.92] Col <sub>hex</sub> +I 69.9 [-1.07]<br>Col <sub>hex</sub> |
| <b>ZnCu1:1_MM</b> | 260                                 | Col <sub>hex</sub> 86.7 [1.97] Iso<br>Col <sub>hex</sub> 86.6 [2.02] Iso                                                                               | Iso 82.0 [-2.50] Col <sub>hex</sub><br>Iso 81.7 [-2.44] Col <sub>hex</sub>                                                                                |
| <b>ZnCu3:1_MM</b> | 284                                 | Col <sub>hex</sub> 81.8 [2.71] Iso<br>Col <sub>hex</sub> 81.5 [2.81] Iso                                                                               | Iso 75.7 [-2.46] Col <sub>hex</sub><br>Iso 75.2 [-2.29] Col <sub>hex</sub>                                                                                |

[a] Decomposition temperature at 5% weight-loss (from TGA). [b] Cr: crystalline phase, Col<sub>rec</sub>: columnar rectangular mesophase, Col<sub>hex</sub>: columnar hexagonal mesophase. [c] DSC data on the first and second heating and cooling cycles; transition temperature is the given as the peak temperature.

S/WAXS

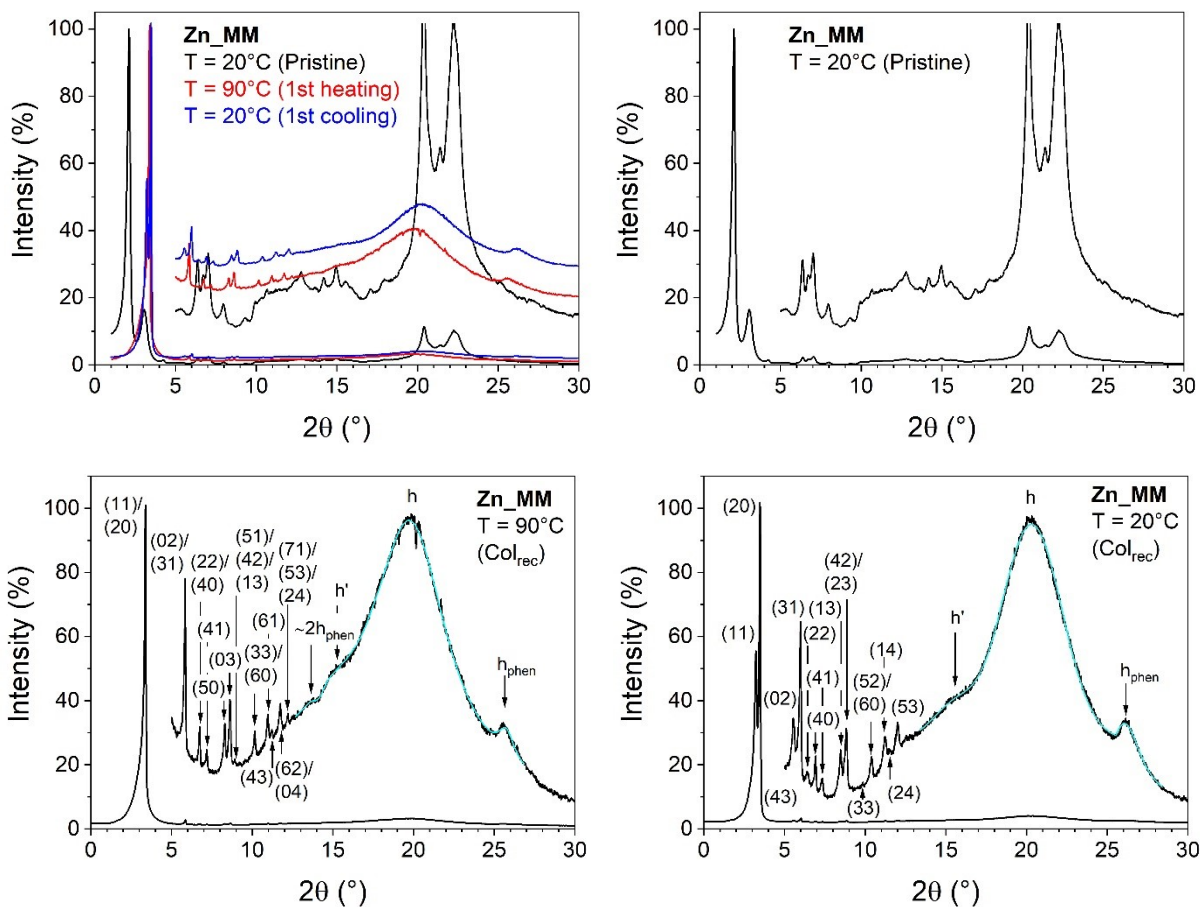

Figure S7. S/WAXS patterns of Zn<sub>2</sub>MM at various temperatures.

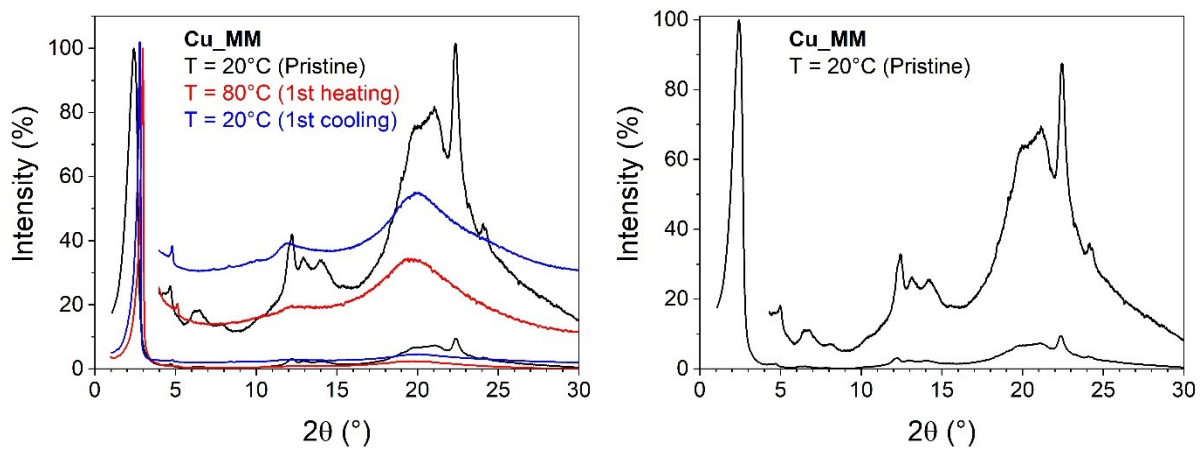

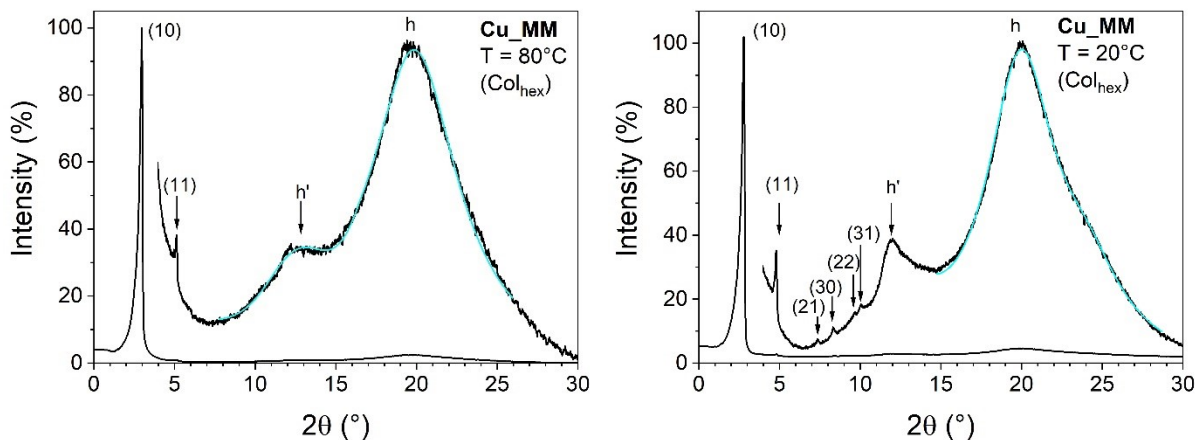

**Figure S8.** S/WAXS patterns of **Cu\_MM** at various temperatures.

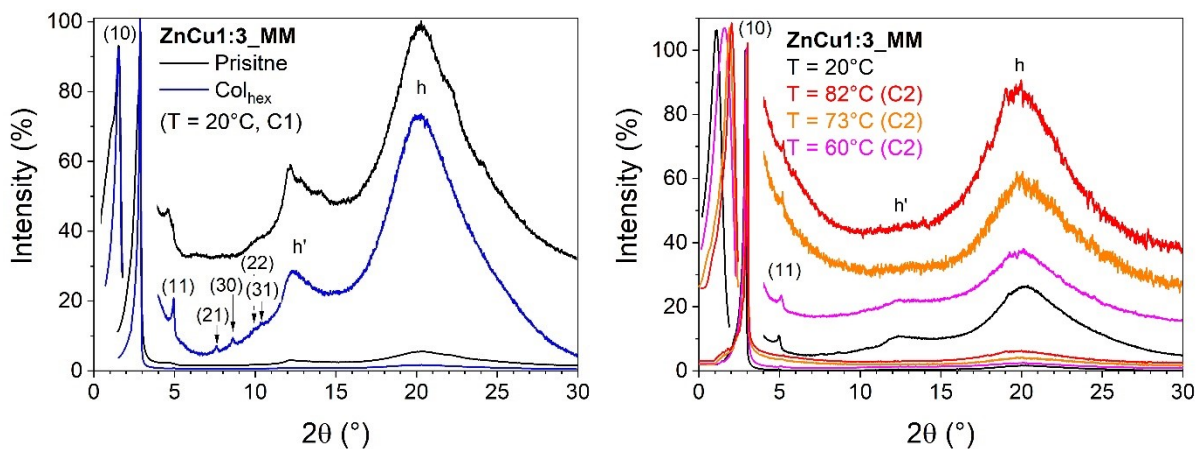

**Figure S9.** S/WAXS patterns of **ZnCu1:3\_MM** at various temperatures. Left: heated to 70°C then cooled to 20°C, without crossing the isotropic temperature. Right: Second heating after thermal treatment.

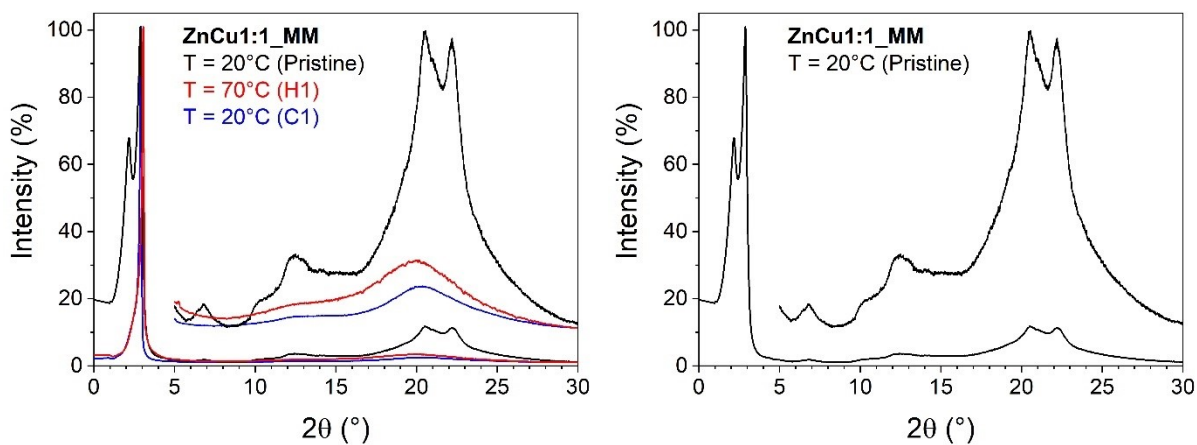

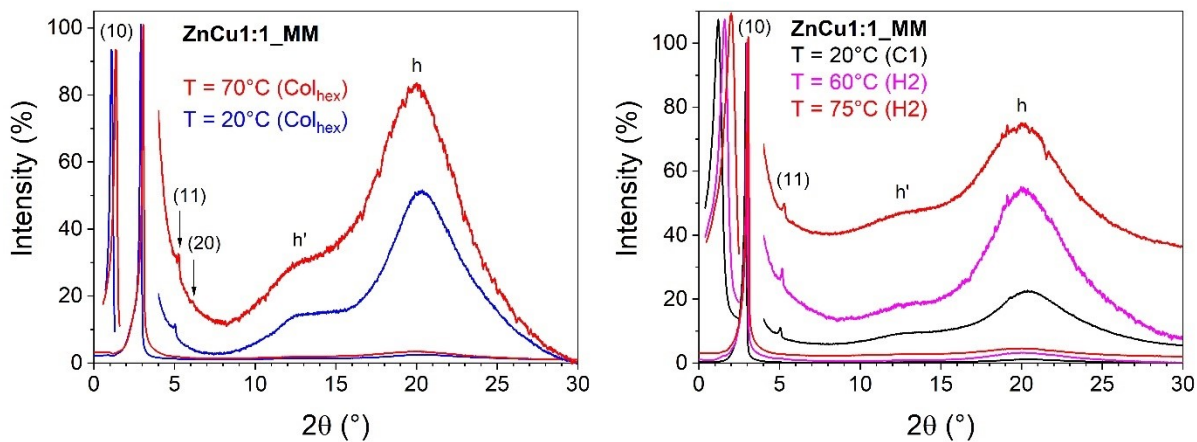

Figure S10. S/WAXS patterns of ZnCu1:1\_MM at various temperatures after thermal treatment.

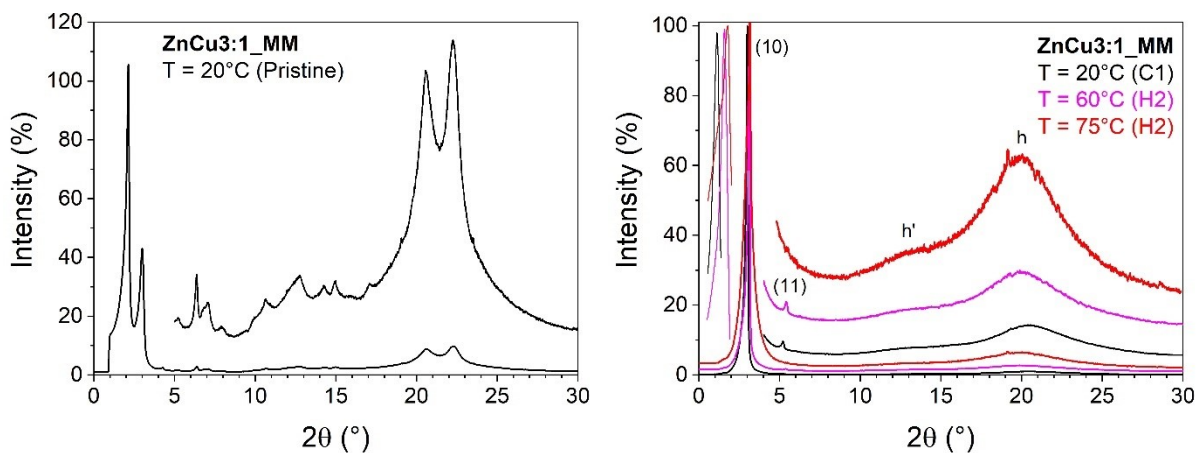

Figure S11. S/WAXS patterns of ZnCu3:1\_MM at various temperatures and after thermal treatment.

**Table S2.** Indexation and mesophases' parameters

| Complex/<br>blend                             | T       | 2 $\theta$ | d <sub>meas.</sub> | hk                | l       | d <sub>calc.</sub>  | $\Delta$  | Parameters                                                                                                                                                                          |
|-----------------------------------------------|---------|------------|--------------------|-------------------|---------|---------------------|-----------|-------------------------------------------------------------------------------------------------------------------------------------------------------------------------------------|
| <b>Zn_MM</b><br><i>Col<sub>rec</sub>-p2gg</i> | 90      | 3.395      | 26.00              | 11/20             | VW (sh) | 26.00               | 0.00      | a = 52.00 Å<br>b = 32.02 Å<br>A = 1665.04 Å <sup>3</sup><br>Z <sub>col</sub> = 2<br><br>V <sub>mol</sub> = 2720 Å <sup>3</sup><br>h <sub>mol</sub> = 3.27 Å<br>N <sub>mol</sub> = 1 |
|                                               |         | 5.882      | 15.01              | 31/02             | VS (sh) | 15.01               | 0.00      |                                                                                                                                                                                     |
|                                               |         | 6.793      | 13.01              | 40/22             | W (sh)  | 13.00               | 0.01      |                                                                                                                                                                                     |
|                                               |         | 7.235      | 12.21              | 41                | VW (sh) | 11.93               | 0.28      |                                                                                                                                                                                     |
|                                               |         | 8.351      | 10.58              | 50                | VW (sh) | 10.40               | 0.18      |                                                                                                                                                                                     |
|                                               |         | 8.728      | 10.12              | 03                | VW (sh) | 10.01               | 0.11      |                                                                                                                                                                                     |
|                                               |         | 8.992      | 9.82               | 51/42/13          | VW (sh) | 9.83                | 0.01      |                                                                                                                                                                                     |
|                                               |         | 10.196     | 8.67               | 60/33             | VW (sh) | 8.67                | 0.00      |                                                                                                                                                                                     |
|                                               |         | 10.970     | 8.05               | 61                | VW (sh) | 8.33                | 0.28      |                                                                                                                                                                                     |
|                                               |         | 11.262     | 7.85               | 43                | VW (sh) | 7.93                | 0.08      |                                                                                                                                                                                     |
|                                               |         | 11.779     | 7.51               | 04/62             | VW (sh) | 7.50                | 0.01      |                                                                                                                                                                                     |
|                                               |         | 12.242     | 7.22               | 71/53/24          | VW (sh) | 7.21                | 0.01      |                                                                                                                                                                                     |
|                                               |         | 13.61      | 6.50               | -                 | W (br)  | ~2h <sub>phen</sub> |           |                                                                                                                                                                                     |
|                                               |         | 15.35      | 5.77               | -                 | W (br)  | h'                  |           |                                                                                                                                                                                     |
|                                               |         | 19.84      | 4.47               | -                 | VS (br) | h                   |           |                                                                                                                                                                                     |
|                                               |         | 26.32      | 3.38               | -                 | W (br)  | h <sub>phen</sub>   |           |                                                                                                                                                                                     |
| <b>Zn_MM</b><br><i>Col<sub>rec</sub>-p2gg</i> | 20      | 3.247      | 27.19              | 11                | VS (sh) | 27.19               | 0.00      | a = 50.24 Å<br>b = 32.33 Å<br>A = 1624.26 Å <sup>3</sup><br>Z <sub>col</sub> = 2<br><br>V <sub>mol</sub> = 2600 Å <sup>3</sup><br>h <sub>mol</sub> = 3.20 Å<br>N <sub>mol</sub> = 1 |
|                                               |         | 3.506      | 25.12              | 20                | VS (sh) | 25.12               | 0.00      |                                                                                                                                                                                     |
|                                               |         | 5.472      | 16.14              | 02                | W (sh)  | 16.16               | 0.02      |                                                                                                                                                                                     |
|                                               |         | 6.008      | 14.70              | 31                | VW (sh) | 14.87               | 0.17      |                                                                                                                                                                                     |
|                                               |         | 6.437      | 13.72              | 22                | VW (sh) | 13.59               | 0.13      |                                                                                                                                                                                     |
|                                               |         | 6.950      | 12.71              | 40                | VW (sh) | 12.56               | 0.15      |                                                                                                                                                                                     |
|                                               |         | 7.372      | 11.98              | 41                | VW (sh) | 11.77               | 0.21      |                                                                                                                                                                                     |
|                                               |         | 8.456      | 10.44              | 13                | VW (sh) | 10.54               | 0.10      |                                                                                                                                                                                     |
|                                               |         | 8.934      | 9.88               | 42/23             | VW (sh) | 9.92/9.90           | 0.04/0.02 |                                                                                                                                                                                     |
|                                               |         | 9.861      | 8.96               | 33                | VW (sh) | 9.06                | 0.10      |                                                                                                                                                                                     |
|                                               |         | 10.432     | 8.47               | 60/52             | VW (sh) | 8.37/8.53           | 0.10/0.08 |                                                                                                                                                                                     |
|                                               |         | 11.285     | 7.83               | 14                | VW (sh) | 7.98                | 0.15      |                                                                                                                                                                                     |
|                                               |         | 11.568     | 7.64               | 24                | VW (sh) | 7.70                | 0.06      |                                                                                                                                                                                     |
|                                               |         | 12.046     | 7.34               | 53                | VW (sh) | 7.35                | 0.01      |                                                                                                                                                                                     |
|                                               |         | 15.56      | 5.69               | -                 | W (br)  | h'                  |           |                                                                                                                                                                                     |
|                                               |         | 20.33      | 4.36               | -                 | VS (br) | h                   |           |                                                                                                                                                                                     |
| 26.09                                         | 3.41    | -          | W (br)             | h <sub>phen</sub> |         |                     |           |                                                                                                                                                                                     |
| <b>ZnCu3:1_MM</b>                             | 20      | 2.993      | 29.43              | 10                | VS (sh) | 29.40               | 0.03      | a = 33.95 Å<br>A = 998.08 Å <sup>3</sup><br>Z <sub>col</sub> = 1<br><br>V <sub>mol</sub> = 2591 Å <sup>3</sup><br>h <sub>mol</sub> = 3.90 Å<br>N <sub>mol</sub> = 1.5               |
|                                               |         | 5.206      | 16.96              | 11                | VW (sh) | 16.97               | 0.01      |                                                                                                                                                                                     |
|                                               |         | 12.84      | 6.89               | -                 | S (br)  | h'                  |           |                                                                                                                                                                                     |
|                                               |         | 20.48      | 4.33               | -                 | VS (br) | h                   |           |                                                                                                                                                                                     |
| <b>ZnCu3:1_MM</b>                             | 60<br>* | 3.136      | 28.15              | 10                | VS (sh) | 28.13               | 0.02      | a = 32.48 Å<br>A = 913.75 Å <sup>3</sup><br>Z <sub>col</sub> = 1<br><br>V <sub>mol</sub> = 2656 Å <sup>3</sup><br>h <sub>mol</sub> = 4.36 Å<br>N <sub>mol</sub> = 1.5               |
|                                               |         | 5.440      | 16.23              | 11                | VW (sh) | 16.24               | 0.01      |                                                                                                                                                                                     |
|                                               |         | 12.67      | 6.98               | -                 | S (br)  | -                   |           |                                                                                                                                                                                     |
|                                               |         | 19.98      | 4.44               | -                 | VS (br) | -                   |           |                                                                                                                                                                                     |
| <b>ZnCu3:1_MM</b>                             | 75      | 3.200      | 27.57              | 10                | VS (sh) | 27.57               | -         | a = 31.83 Å                                                                                                                                                                         |

|                                                    |         |                                                                      |                                                                  |                                            |                                                                                    |                                                             |                                              |                                                                                                                                                           |
|----------------------------------------------------|---------|----------------------------------------------------------------------|------------------------------------------------------------------|--------------------------------------------|------------------------------------------------------------------------------------|-------------------------------------------------------------|----------------------------------------------|-----------------------------------------------------------------------------------------------------------------------------------------------------------|
|                                                    | *       | 12.94<br>19.83                                                       | 6.83<br>4.47                                                     | -<br>-                                     | S (br)<br>VS (br)                                                                  | -<br>-                                                      |                                              | A = 877.69 Å<br>Z <sub>col</sub> = 1<br><br>V <sub>mol</sub> = 2683 Å <sup>3</sup><br>h <sub>mol</sub> = 4.58 Å<br>N <sub>mol</sub> = 1.5                 |
| <b>ZnCu1:1_MM</b><br><i>Col<sub>hex</sub>-p6mm</i> | 70      | 3.044<br>5.275<br>6.100<br>12.57<br>19.90                            | 29.00<br>16.74<br>14.48<br>7.03<br>4.46                          | 10<br>11<br>20<br>-<br>-                   | VS (sh)<br>W (sh)<br>VW (sh)<br>S (br)<br>VS (br)                                  | 28.98<br>16.73<br>14.49<br>h'<br>h                          | 0.02<br>0.01<br>0.01                         | a = 33.46 Å<br>A = 969.76 Å<br>Z <sub>col</sub> = 1<br><br>V <sub>mol</sub> = 2665 Å <sup>3</sup><br>h <sub>mol</sub> = 4.12 Å<br>N <sub>mol</sub> = 1.5  |
| <b>ZnCu1:1_MM</b><br><i>Col<sub>hex</sub>-p6mm</i> | 20      | 2.916<br>5.052<br>12.47<br>20.39                                     | 30.28<br>17.48<br>7.09<br>4.35                                   | 10<br>11<br>-<br>-                         | VS (sh)<br>W (sh)<br>S (br)<br>VS (br)                                             | 30.28<br>17.48<br>h'<br>h                                   | 0.00<br>0.00                                 | a = 34.96 Å<br>A = 1058.72 Å<br>Z <sub>col</sub> = 1<br><br>V <sub>mol</sub> = 2582 Å <sup>3</sup><br>h <sub>mol</sub> = 3.66 Å<br>N <sub>mol</sub> = 1.5 |
| <b>ZnCu1:1_MM</b>                                  | 20<br>* | 2.946<br>5.103<br>12.48<br>20.35                                     | 29.96<br>17.30<br>7.09<br>4.36                                   | 10<br>11<br>-<br>-                         | VS (sh)<br>W (sh)<br>S (br)<br>VS (br)                                             | 29.96<br>17.30<br>h'<br>h                                   | 0.00<br>0.00                                 | a = 34.59 Å<br>A = 1036.46 Å<br>Z <sub>col</sub> = 1<br><br>V <sub>mol</sub> = 2582 Å <sup>3</sup><br>h <sub>mol</sub> = 3.74 Å<br>N <sub>mol</sub> = 1.5 |
| <b>ZnCu1:1_MM</b>                                  | 60<br>* | 2.987<br>5.179<br>12.62<br>20.16                                     | 29.55<br>17.04<br>7.01<br>4.40                                   | 10<br>11<br>-<br>-                         | VS (sh)<br>W (sh)<br>S (br)<br>VS (br)                                             | 29.53<br>17.05<br>h'<br>h                                   | 0.02<br>0.01                                 | a = 34.10 Å<br>A = 1007.04 Å<br>Z <sub>col</sub> = 1<br><br>V <sub>mol</sub> = 2647 Å <sup>3</sup><br>h <sub>mol</sub> = 3.94 Å<br>N <sub>mol</sub> = 1.5 |
| <b>ZnCu1:1_MM</b>                                  | 75<br>* | 3.071<br>5.321<br>12.40<br>20.11                                     | 28.74<br>16.59<br>7.13<br>4.41                                   | 10<br>11<br>-<br>-                         | VS (sh)<br>W (sh)<br>S (br)<br>VS (br)                                             | 28.74<br>16.59<br>h'<br>h                                   | 0.00<br>0.00                                 | a = 33.19 Å<br>A = 953.77 Å<br>Z <sub>col</sub> = 1<br><br>V <sub>mol</sub> = 2674 Å <sup>3</sup><br>h <sub>mol</sub> = 4.20 Å<br>N <sub>mol</sub> = 1.5  |
| <b>ZnCu1:3_MM</b><br><i>Col<sub>hex</sub>-p6mm</i> | 20      | 2.883<br>4.997<br>7.631<br>8.648<br>10.02<br>10.40<br>12.30<br>20.09 | 30.61<br>17.67<br>11.57<br>10.22<br>8.82<br>8.50<br>7.19<br>4.41 | 10<br>11<br>21<br>30<br>22<br>31<br>-<br>- | VS (sh)<br>W (sh)<br>VW (sh)<br>VW (sh)<br>VW (sh)<br>VW (sh)<br>S (br)<br>VS (br) | 30.61<br>17.67<br>11.57<br>10.20<br>8.84<br>8.49<br>h'<br>h | 0.00<br>0.00<br>0.00<br>0.02<br>0.02<br>0.01 | a = 35.34 Å<br>A = 1081.92 Å<br>Z <sub>col</sub> = 1<br><br>V <sub>mol</sub> = 2573 Å <sup>3</sup><br>h <sub>mol</sub> = 3.57 Å<br>N <sub>mol</sub> = 1.5 |
| <b>ZnCu1:3_MM</b>                                  | 20      | 2.887                                                                | 30.58                                                            | 10                                         | VS (sh)                                                                            | 30.57                                                       | 0.01                                         | a = 35.30 Å                                                                                                                                               |

|                                                     |         |                                                                       |                                                                  |                                            |                                                                                |                                                             |                                                        |                                                                                                                                                           |
|-----------------------------------------------------|---------|-----------------------------------------------------------------------|------------------------------------------------------------------|--------------------------------------------|--------------------------------------------------------------------------------|-------------------------------------------------------------|--------------------------------------------------------|-----------------------------------------------------------------------------------------------------------------------------------------------------------|
| $\text{Col}_{\text{hex-}p6mm}$                      | *       | 5.004<br>12.48<br>20.19                                               | 17.64<br>7.09<br>4.39                                            | 11<br>-<br>-                               | W (sh)<br>S (br)<br>VS (br)                                                    | 17.65<br>h'<br>h                                            | 0.01                                                   | A = 1079.12 Å<br>Z <sub>col</sub> = 1<br><br>V <sub>mol</sub> = 2573 Å <sup>3</sup><br>h <sub>mol</sub> = 3.58 Å<br>N <sub>mol</sub> = 1.5                |
| <b>ZnCu1:3_MM</b><br>$\text{Col}_{\text{hex-}p6mm}$ | 60<br>* | 2.963<br>5.132<br>12.39<br>19.90                                      | 29.81<br>17.20<br>7.14<br>4.46                                   | 10<br>11<br>-<br>-                         | VS (sh)<br>W (sh)<br>S (br)<br>VS (br)                                         | 29.80<br>17.20<br>h'<br>h                                   | 0.01<br>0.00                                           | a = 34.41 Å<br>A = 1025.42 Å<br>Z <sub>col</sub> = 1<br><br>V <sub>mol</sub> = 2638 Å <sup>3</sup><br>h <sub>mol</sub> = 3.86 Å<br>N <sub>mol</sub> = 1.5 |
| <b>ZnCu1:3_MM</b><br>$\text{Col}_{\text{hex-}p6mm}$ | 73<br>* | 3.005<br>5.215<br>20.00                                               | 29.37<br>16.93<br>4.44                                           | 10<br>11<br>-                              | VS (sh)<br>W (sh)<br>VS (br)                                                   | 29.35<br>16.94<br>h                                         | 0.02<br>0.01                                           | a = 33.89 Å<br>A = 994.47 Å<br>Z <sub>col</sub> = 1<br><br>V <sub>mol</sub> = 2661 Å <sup>3</sup><br>h <sub>mol</sub> = 4.01 Å<br>N <sub>mol</sub> = 1.5  |
| <b>ZnCu1:3_MM</b><br>$\text{Col}_{\text{hex-}p6mm}$ | 82<br>* | 3.044<br>5.278<br>19.90                                               | 29.00<br>16.73<br>4.46                                           | 10<br>11<br>-                              | VS (sh)<br>W (sh)<br>VS (br)                                                   | 28.99<br>16.74<br>h                                         | 0.01<br>0.01                                           | a = 33.47 Å<br>A = 970.34 Å<br>Z <sub>col</sub> = 1<br><br>V <sub>mol</sub> = 2678 Å <sup>3</sup><br>h <sub>mol</sub> = 4.14 Å<br>N <sub>mol</sub> = 1.5  |
|                                                     |         |                                                                       |                                                                  |                                            |                                                                                |                                                             |                                                        |                                                                                                                                                           |
| <b>Cu_MM</b><br>$\text{Col}_{\text{hex-}p6mm}$      | 80      | 2.974<br>5.152<br>12.70<br>19.88                                      | 29.68<br>17.14<br>6.96<br>4.46                                   | 10<br>11<br>-<br>-                         | VS (sh)<br>W (sh)<br>M (br)<br>VS (br)                                         | 29.68<br>17.14<br>h'<br>h                                   | 0.00<br>0.00<br>-<br>-                                 | a = 34.27 Å<br>A = 1017.18 Å<br>Z <sub>col</sub> = 1<br><br>V <sub>mol</sub> = 2682 Å <sup>3</sup><br>h <sub>mol</sub> = 3.95 Å<br>N <sub>mol</sub> = 1.5 |
| <b>Cu_MM</b><br>$\text{Col}_{\text{hex-}p6mm}$      | 20      | 2.781<br>4.817<br>7.377<br>8.338<br>9.674<br>10.034<br>11.97<br>19.99 | 31.74<br>18.33<br>11.97<br>10.59<br>9.13<br>8.81<br>7.39<br>4.44 | 10<br>11<br>21<br>30<br>22<br>31<br>-<br>- | VS (sh)<br>M (sh)<br>W (sh)<br>W (sh)<br>W (sh)<br>W (sh)<br>M (br)<br>VS (br) | 31.72<br>18.31<br>11.99<br>10.57<br>9.16<br>8.80<br>h'<br>h | 0.02<br>0.02<br>0.02<br>0.02<br>0.03<br>0.01<br>-<br>- | a = 36.63 Å<br>A = 1161.81 Å<br>Z <sub>col</sub> = 1<br><br>V <sub>mol</sub> = 2581 Å <sup>3</sup><br>h <sub>mol</sub> = 3.33 Å<br>N <sub>mol</sub> = 1.5 |

Annotation. T: temperature of the experiment;  $2\theta$ : measured diffraction angles;  $d_{\text{meas.}}$  and  $d_{\text{calc.}}$ : measured and calculated distances; VS, S, M, W, VW stand for very strong, strong, medium, weak, very weak; sh and br stand for sharp and broad;  $hk$ : Miller indices of columnar lattice reflection; h: average distance between alkyl chains and gallate fragments,  $h = h_{\text{ch}} + h_{\text{gal}} (+h_{\text{phen}})$ ;  $h' \approx 2h_{\text{phen.}}$ ;  $h_{\text{phen}}$ : average stacking distance between the phen fragments; a: columnar lattice parameters;  $\Delta = |d_{\text{meas.}} - d_{\text{calc.}}|$ ; a,b: lattice parameters; S: columnar cross-section ( $A = S = a^2/\sqrt{3}$  for  $\text{Col}_{\text{hex}}$ , and  $A = 2S = a \times b$  for  $\text{Col}_{\text{rec}}$ ); Z<sub>col</sub>: number of columns per lattice; V<sub>mol</sub>: molecular volume; h<sub>mol</sub>: columnar slice thickness; N<sub>mol</sub>: number of molecules per slice of column h<sub>mol</sub>-thick:  $h_{\text{mol}} \times A / Z_{\text{col}} = N_{\text{mol}} \times V_{\text{mol}}$ . \* After thermal treatment (i.e. heating above the isotropic temperature and cooled down).

## Optical properties

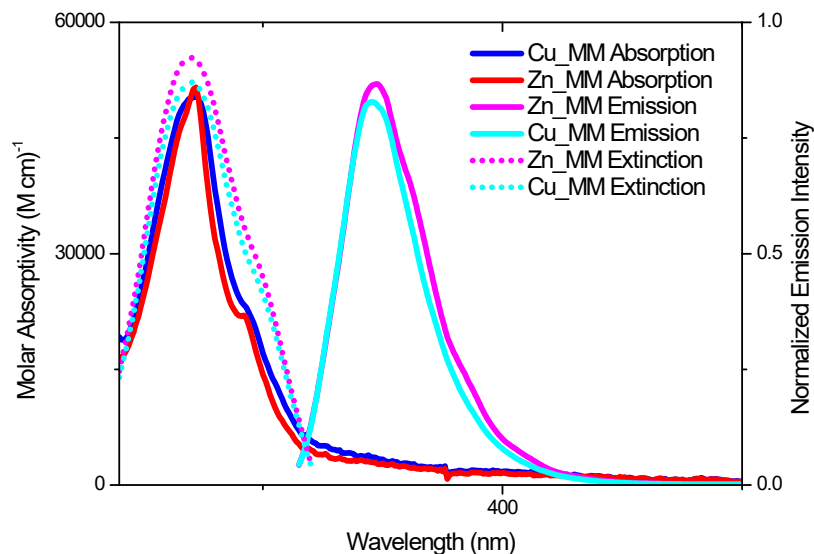

**Figure S12.** Absorption, Emission ( $\lambda_{\text{ex}} = 292 \text{ nm}$ ) and Excitation ( $\lambda_{\text{em}} = 345 \text{ nm}$ ) spectra of **Cu\_MM** and **Zn\_MM** in  $\text{CH}_2\text{Cl}_2$  dilute solutions ( $2.7 \cdot 10^{-6} \text{ M}$ ).

**Table S3.** Main photophysical data of complexes in  $\text{CH}_2\text{Cl}_2$  dilute solution.

| Sample       | Absorption, $\lambda_{\text{max}}/\text{nm}$<br>( $\epsilon/\text{M}^{-1} \text{ cm}^{-1}$ ) | Emission, $\lambda_{\text{max}}/\text{nm}$<br>[ $\lambda_{\text{ex}}/\text{nm}$ ] | Lifetime, $\tau/\text{ns}$ | Quantum yields, $\phi / \%$<br>[Concentration, mol/L] |
|--------------|----------------------------------------------------------------------------------------------|-----------------------------------------------------------------------------------|----------------------------|-------------------------------------------------------|
| <b>Cu_MM</b> | 266(46700), 272(50400),<br>292(23400)                                                        | 345 [293]                                                                         | 2.6                        | 7.5 [ $2.7 \cdot 10^{-6} \text{ M}$ ]                 |
|              |                                                                                              |                                                                                   |                            | 5.6 [ $5.4 \cdot 10^{-6} \text{ M}$ ]                 |
|              |                                                                                              |                                                                                   |                            | 4.4 [ $8.1 \cdot 10^{-6} \text{ M}$ ]                 |
| <b>Zn_MM</b> | 266(46700), 272(51600),<br>292(22000)                                                        | 345 [293]                                                                         | 2.6                        | 7.9 [ $2.7 \cdot 10^{-6} \text{ M}$ ]                 |
|              |                                                                                              |                                                                                   |                            | 4.5 [ $5.4 \cdot 10^{-6} \text{ M}$ ]                 |
|              |                                                                                              |                                                                                   |                            | 3.3 [ $8.1 \cdot 10^{-6} \text{ M}$ ]                 |



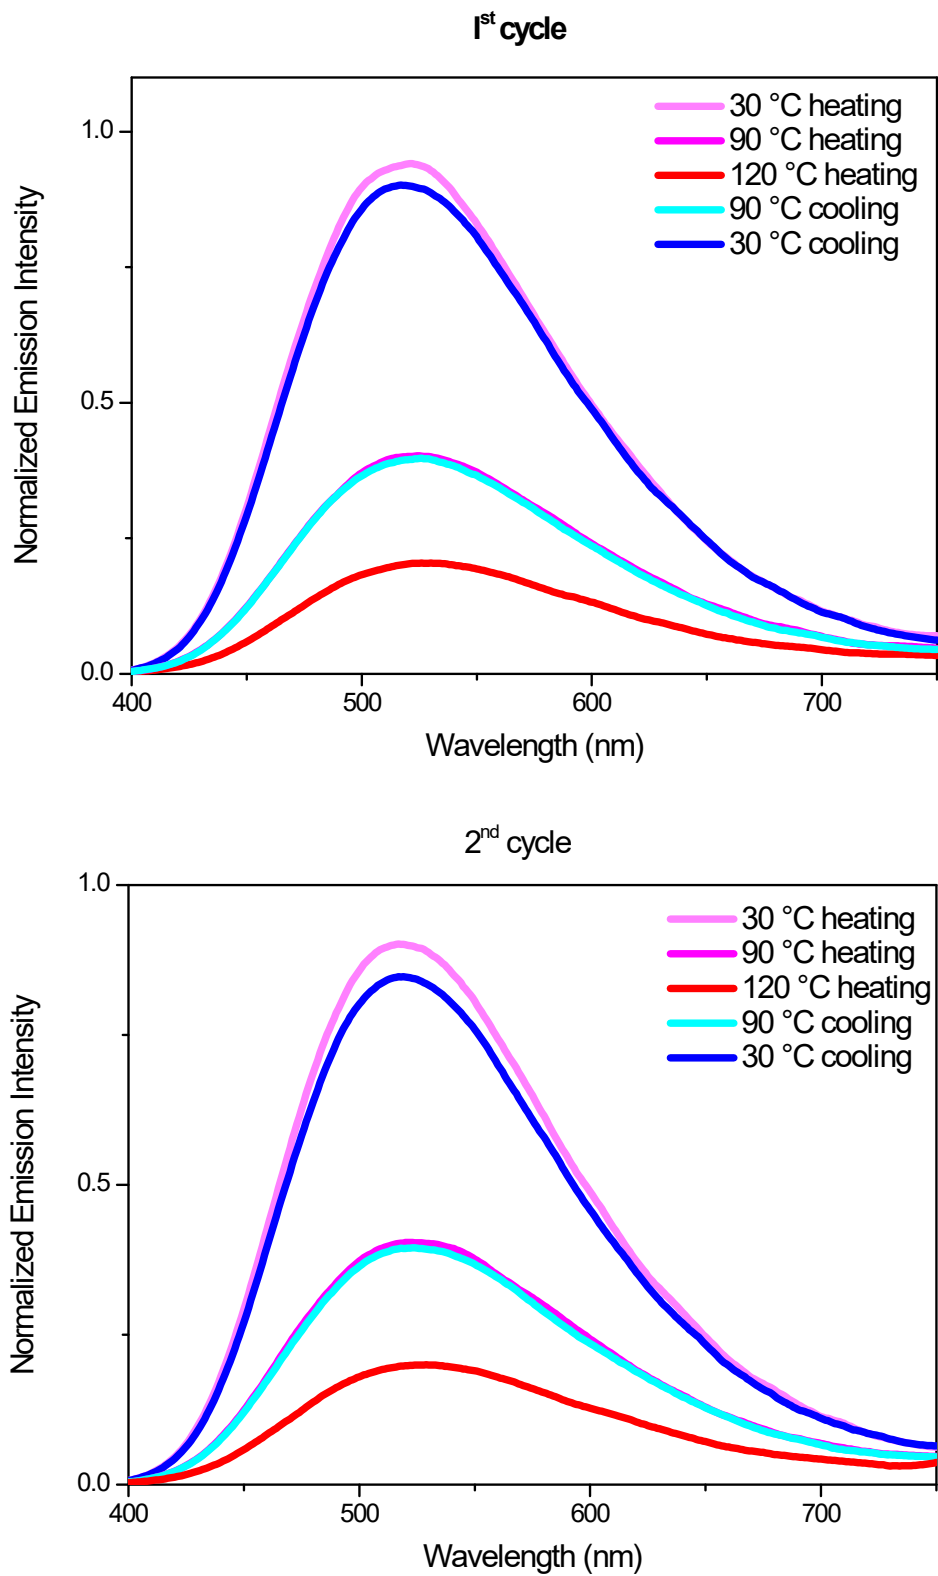

**Figure S13.** Emission spectra of **Zn\_MM** varying temperature during the 1<sup>st</sup> (top) and the 2<sup>nd</sup> (bottom) heating/cooling cycles.

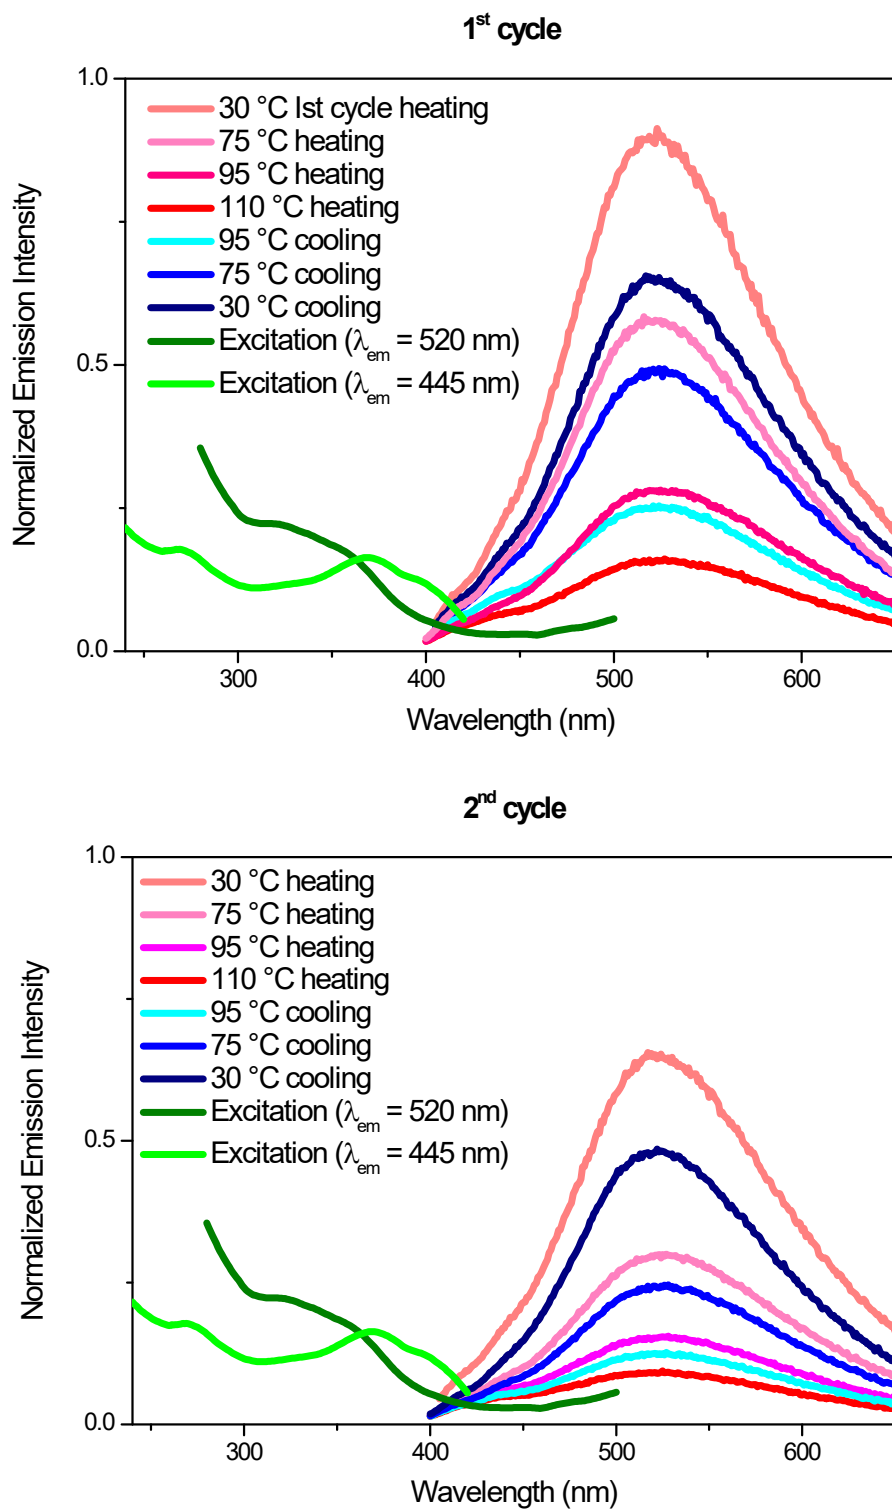

**Figure S14.** Emission spectra of ZnCu<sub>3</sub>:1\_MM varying temperature during the 1<sup>st</sup> (top) and the 2<sup>nd</sup> (bottom) heating/cooling cycles.

**Table S4.** Photophysical data of **Zn\_MM** by varying temperature.

| T (°C)                       | Emission, $\lambda_{\max}/\text{nm}^a$ | Quantum yield, $\phi / \%$ |
|------------------------------|----------------------------------------|----------------------------|
| <b>I<sup>st</sup> cycle</b>  |                                        |                            |
| <b>30</b>                    | 520                                    | <b>3.8</b>                 |
| <b>90</b>                    | 520                                    | <b>1.7</b>                 |
| <b>120</b>                   | 530                                    | <b>0.9</b>                 |
| <b>90</b>                    | 520                                    | <b>1.7</b>                 |
| <b>30</b>                    | 520                                    | <b>3.7</b>                 |
| <b>II<sup>nd</sup> cycle</b> |                                        |                            |
| <b>90</b>                    | 520                                    | <b>1.7</b>                 |
| <b>120</b>                   | 530                                    | <b>0.9</b>                 |
| <b>90</b>                    | 520                                    | <b>1.7</b>                 |
| <b>30</b>                    | 520                                    | <b>3.5</b>                 |

<sup>a</sup> $\lambda_{\text{ex}} = 345 \text{ nm}$ **Table S5.** Photophysical data of sample **ZnCu3:1\_MM** by varying temperature.

| T (°C)                       | Emission, $\lambda_{\max}/\text{nm}^a$ | Integral of emission spectra <sup>b</sup> |
|------------------------------|----------------------------------------|-------------------------------------------|
| <b>I<sup>st</sup> cycle</b>  |                                        |                                           |
| <b>30</b>                    | 445, 523                               | <b>1</b>                                  |
| <b>75</b>                    | 445, 524                               | <b>0.58</b>                               |
| <b>95</b>                    | 445, 524                               | <b>0.32</b>                               |
| <b>110</b>                   | 445, 526                               | <b>0.15</b>                               |
| <b>95</b>                    | 445, 527                               | <b>0.19</b>                               |
| <b>75</b>                    | 445, 525                               | <b>0.31</b>                               |
| <b>30</b>                    | 445, 522                               | <b>0.61</b>                               |
| <b>II<sup>nd</sup> cycle</b> |                                        |                                           |
| <b>75</b>                    | 445, 527                               | <b>0.33</b>                               |
| <b>95</b>                    | 445, 528                               | <b>0.18</b>                               |
| <b>110</b>                   | 445, 525                               | <b>0.11</b>                               |
| <b>95</b>                    | 445, 527                               | <b>0.15</b>                               |
| <b>75</b>                    | 445, 528                               | <b>0.27</b>                               |
| <b>30</b>                    | 445, 522                               | <b>0.50</b>                               |

<sup>a</sup> $\lambda_{\text{ex}} = 345 \text{ nm}$ ; <sup>b</sup>Because an instrumental issue hindered the registration of the emission quantum yield of **ZnCu3:1\_MM** at room temperature, its variation was expressed respect to a reference value, assumed equal to 1

## References

- [1] a) E. I. Szerb, D. Pucci, A. Crispini, M. La Deda, *Mol. Cryst. Liq. Cryst.* **2013**, 573, 34-45; b) A. E. Ozel, S. Kecel, S. Akyuz, *J. Mol. Struct.* **2007**, 834-836, 548-554.
- [2] G. A. Crosby, and J. N. Demas, *Review J. Phys. Chem.* **1971**, 75, 991-1024.
- [3] R. Rusakowicz, and A. C. Testa, *The Journal of Physical Chemistry*, **1951**, 41, 2680-81.
- [4] J. C. de Mello, H. F. Wittmann, and R. H. Friend, *Advanced Materials*, **1997**, 9, 230-2.
